# Supplementary material for: Tablet-Based Outpatient Care for People With Dementia
Source: Atypon-hosted journal article supplement (doi:10.1024/1662-9647/a000210), 2019-08-22
Supplement: 1662-9647_a000210_esm1.pdf [file 1662-9647_a000210_esm1.pdf]

## APPENDIX

### 23-item Checklist for GPs in German (Original)

| Frage                                                                                                                                                                                                                                                                   | ja | nein | Nicht zutreffend |
|-------------------------------------------------------------------------------------------------------------------------------------------------------------------------------------------------------------------------------------------------------------------------|----|------|------------------|
| Wurde ein geriatrisches Basisassessment durchgeführt?                                                                                                                                                                                                                   |    |      |                  |
| Welche der folgenden Untersuchungen wurden im Rahmen der Diagnostik durchgeführt:<br><br>Körperliche und psychopathologische Untersuchung<br>Labor-Diagnostik<br>Differenzialdiagnostik<br>Schweregradabschätzung/Kognitive Testung<br>Verlaufsuntersuchung<br>CCT/fMRT |    |      |                  |
| Wurde ein kognitives Screening in der Hausarztpraxis durchgeführt?                                                                                                                                                                                                      |    |      |                  |
| Wurden weitere körperliche Beeinträchtigungen/Erkrankungen erfasst?                                                                                                                                                                                                     |    |      |                  |
| Wurden weitere psychische Beeinträchtigungen/Erkrankungen erfasst?                                                                                                                                                                                                      |    |      |                  |
| Wurden mit dem Patienten/Angehörigen psychische und Verhaltenssymptome der Demenz ausführlich besprochen?                                                                                                                                                               |    |      |                  |
| Wurde die gesamte aktuelle Medikamenteneinnahme erhoben und besprochen?                                                                                                                                                                                                 |    |      |                  |
| Wurde eine medikamentöse Therapie der Demenz mit dem Patienten/Angehörigen besprochen?                                                                                                                                                                                  |    |      |                  |
| Wurden nicht-medikamentöse Therapieangebote der Demenz mit dem Patienten/Angehörigen besprochen?                                                                                                                                                                        |    |      |                  |
| Wurden dem Patienten nichtmedikamentöse Therapien empfohlen oder verordnet?<br>Wenn ja, welche _____                                                                                                                                                                    |    |      |                  |
| Befindet sich der Patient aufgrund der Demenz in fachärztlicher Behandlung?                                                                                                                                                                                             |    |      |                  |
| Wurden mit dem Patienten/Angehörigen weitere Versorgungsangebote besprochen?                                                                                                                                                                                            |    |      |                  |
| Wurde der Patient/Angehöriger über niedrigschwellige Angebote informiert?                                                                                                                                                                                               |    |      |                  |
| Wurde ein Behandlungsplan zusammen mit dem Patienten/Angehörigen erstellt?                                                                                                                                                                                              |    |      |                  |
| Wurden mit dem Patienten/Angehörigen Alltagsgestaltung und -kompetenzen besprochen?                                                                                                                                                                                     |    |      |                  |
| Wurden mit dem Patienten/Angehörigen eigentherapeutische Maßnahmen besprochen?                                                                                                                                                                                          |    |      |                  |
| Wurden neu aufgetretene Risiken besprochen? (z.B. Selbst-, Fremdgefährdung)                                                                                                                                                                                             |    |      |                  |
| Wurde mit dem Patienten/Angehörigen die Fahrtauglichkeit besprochen?                                                                                                                                                                                                    |    |      |                  |
| Wurde der Patient/Angehörige auf die Beantragung eines Pflegegrades angesprochen?                                                                                                                                                                                       |    |      |                  |
| Wurde der Patient/Angehörige auf rechtliche Vorsorgemaßnahmen angesprochen?                                                                                                                                                                                             |    |      |                  |
| Wurde über Palliativversorgung gesprochen?                                                                                                                                                                                                                              |    |      |                  |
| Wurde die Belastungssituation des Angehörigen ausführlich besprochen?                                                                                                                                                                                                   |    |      |                  |
| Wurde der Angehörige über Entlastungs- und Beratungsangebote informiert?                                                                                                                                                                                                |    |      |                  |

## 23-item Checklist for GPs in English (simple translation)

| Question                                                                                                                                                                                                                                                                                        | yes | no | Not applicable |
|-------------------------------------------------------------------------------------------------------------------------------------------------------------------------------------------------------------------------------------------------------------------------------------------------|-----|----|----------------|
| Was a basic geriatric assessment (geriatrisches Basisassessment) conducted?                                                                                                                                                                                                                     |     |    |                |
| Which of the following examinations were conducted during the diagnostic process?<br><br>Physical examination and psychopathological/psychiatric evaluation<br>Laboratory tests<br>Differential diagnostics<br>Cognitive and neuropsychological tests<br>Recent medical history<br>CT/MRI scans |     |    |                |
| Did the GP administer a cognitive screening test?                                                                                                                                                                                                                                               |     |    |                |
| Were further physical impairments/medical conditions assessed?                                                                                                                                                                                                                                  |     |    |                |
| Were further mental health impairments/psychiatric conditions assessed?                                                                                                                                                                                                                         |     |    |                |
| Did the patient/family caregiver receive advice concerning psychological and behavioral symptoms of dementia?                                                                                                                                                                                   |     |    |                |
| Was the entire current medication assessed and discussed?                                                                                                                                                                                                                                       |     |    |                |
| Were pharmacological treatment options for dementia discussed with the patient/family caregiver?                                                                                                                                                                                                |     |    |                |
| Were non-pharmacological interventions for dementia discussed with the patient/family caregiver?                                                                                                                                                                                                |     |    |                |
| Were non-pharmacological interventions for dementia recommended or prescribed?<br>If yes, which intervention _____                                                                                                                                                                              |     |    |                |
| Is the patient currently being treated by a dementia specialist (i.e. neurologist, geriatric psychiatrist)?                                                                                                                                                                                     |     |    |                |
| Were further care services for people with dementia discussed with the patient/family caregiver?                                                                                                                                                                                                |     |    |                |
| Was the patient/family caregiver informed about local support services for people with dementia?                                                                                                                                                                                                |     |    |                |
| Was a care plan developed with the patient/family caregiver?                                                                                                                                                                                                                                    |     |    |                |
| Were daily activities and how to maintain them discussed with the patient/family caregiver?                                                                                                                                                                                                     |     |    |                |
| Were self-help measures discussed with the patient/family caregiver?                                                                                                                                                                                                                            |     |    |                |
| Were newly emerging risks assessed and discussed? (i.e. self-harm or harming others)                                                                                                                                                                                                            |     |    |                |
| Were driving skills or lack thereof discussed with the patient/family caregiver?                                                                                                                                                                                                                |     |    |                |
| Was the patient/family caregiver approached about an application for a care level from the German nursing care insurance (Pflegegrad)?                                                                                                                                                          |     |    |                |
| Was the patient/family caregiver made aware of their rights and the availability of local advocacy services?                                                                                                                                                                                    |     |    |                |
| Was palliative care discussed?                                                                                                                                                                                                                                                                  |     |    |                |
| Was the caregiver stress level discussed in detail with the family caregiver?                                                                                                                                                                                                                   |     |    |                |
| Was the family caregiver informed about available resources and support offers for family carers?                                                                                                                                                                                               |     |    |                |

## 19-item Checklist for informal caregivers in German (Original)

| Frage                                                                                                                                                | ja | nein | Weiß nicht |
|------------------------------------------------------------------------------------------------------------------------------------------------------|----|------|------------|
| Hat der Hausarzt den Studienteilnehmer aufgrund der Demenz zu einem Facharzt (Neurologe, Psychiater, Nervenarzt, Gedächtnissprechstunde) überwiesen? |    |      |            |
| Hat der Hausarzt mit Ihnen/dem Studienteilnehmer eine medikamentöse Therapie der Demenz besprochen?                                                  |    |      |            |
| Hat der Hausarzt eine demenzspezifische, medikamentöse Therapie in den letzten 9 Monaten angepasst oder neu verordnet?                               |    |      |            |
| Hat der Hausarzt mit Ihnen/dem Studienteilnehmer mögliche medikamentöse Nebenwirkungen besprochen?                                                   |    |      |            |
| Hat der Hausarzt mit Ihnen/dem Studienteilnehmer nicht-medikamentöse Therapieangebote der Demenz besprochen?                                         |    |      |            |
| Hat der Hausarzt dem Studienteilnehmer eine nichtmedikamentöse Therapie verordnet oder empfohlen?                                                    |    |      |            |
| Hat der Hausarzt mit Ihnen/dem Studienteilnehmer psychische und Verhaltenssymptome der Demenz besprochen?                                            |    |      |            |
| Hat der Hausarzt mit Ihnen/dem Studienteilnehmer weitere Versorgungsangebote besprochen? (z.B. Hilfsmittel, Tagespflege)                             |    |      |            |
| Wurden Sie/der Studienteilnehmer über niedrigschwellige Angebote informiert? (z.B. Beratung, Gruppenangebote)                                        |    |      |            |
| Hat der Hausarzt mit dem Studienteilnehmer/Ihnen neu aufgetretene Risiken besprochen? (z.B. Selbst-, Fremdgefährdung)                                |    |      |            |
| Hat der Hausarzt mit dem Studienteilnehmer/Ihnen Alltagsgestaltung und -kompetenzen besprochen?                                                      |    |      |            |
| Hat der Hausarzt mit dem Studienteilnehmer/Ihnen eigentherapeutische Maßnahmen und Ziele besprochen?                                                 |    |      |            |
| Wurde ein Behandlungsplan zusammen mit dem Hausarzt erstellt?                                                                                        |    |      |            |
| Hat der Hausarzt mit dem Studienteilnehmer/Ihnen die Beantragung eines Pflegegrades besprochen?                                                      |    |      |            |
| Hat der Hausarzt Ihre Belastungssituation erfasst?                                                                                                   |    |      |            |
| Hat der Hausarzt Sie über Entlastungs- und Beratungsangebote für Sie selbst informiert?                                                              |    |      |            |
| Hat der Hausarzt mit dem Studienteilnehmer/Ihnen rechtliche Vorsorgemaßnahmen besprochen?                                                            |    |      |            |
| Hat der Hausarzt mit dem Studienteilnehmer/Ihnen Palliativversorgung besprochen?                                                                     |    |      |            |
| Hat der Hausarzt mit Ihnen/dem Studienteilnehmer die Fahrtauglichkeit besprochen?                                                                    |    |      |            |

## 19-item Checklist for informal caregivers in English (simple translation)

| Question                                                                                                                                       | yes | no | Don't know |
|------------------------------------------------------------------------------------------------------------------------------------------------|-----|----|------------|
| Was the participant referred to a dementia specialist (i.e. neurologist, psychiatrist, memory clinic) by his or her GP?                        |     |    |            |
| Did the GP discuss pharmacological treatment options with you and/or the participant?                                                          |     |    |            |
| Was a dementia specific pharmacological therapy adjusted or newly prescribed within the past 9 months?                                         |     |    |            |
| Did the GP discuss possible adverse effects of pharmacological therapies with the participant?                                                 |     |    |            |
| Did the GP discuss non-pharmacological treatment options with you and/or the participant?                                                      |     |    |            |
| Did the GP recommend or prescribe a non-pharmacological intervention to you and/or the participant?                                            |     |    |            |
| Did the GP discuss psychological and behavioral symptoms of dementia with you and/or the participant?                                          |     |    |            |
| Did the GP discuss further care services (i.e. day care facilities, nursing aids) for people with dementia with you and/or the participant?    |     |    |            |
| Did the GP inform you and/or the participant about local support services for people with dementia?                                            |     |    |            |
| Did the GP discuss newly emerging risks (i.e. self-harm or harming others) with you and/or the participant?                                    |     |    |            |
| Did the GP talk to you and/or the participant about daily activities and how to maintain them?                                                 |     |    |            |
| Did the GP discuss self-help measures and goals with you and/or the participant?                                                               |     |    |            |
| Was a care plan developed with the GP?                                                                                                         |     |    |            |
| Did the GP approach you and/or the family caregiver about an application for a care level from the German nursing care insurance (Pflegegrad)? |     |    |            |
| Did the GP assess your stress level?                                                                                                           |     |    |            |
| Did the GP inform you about available resources and support offers?                                                                            |     |    |            |
| Did the GP inform you and/or the participant about advocacy services?                                                                          |     |    |            |
| Did the GP discuss palliative care with you and/or the participant?                                                                            |     |    |            |
| Did the GP discuss driving skills or lack thereof with you and/or the participant?                                                             |     |    |            |
